# Supplementary material
Source: publisher figshare collection journal article supplement (https://karger.figshare.com/ndownloader/files/21847404)
Supplement: Supplementary file 1 [file 21847404]

**Appendix Table 1:** p-values for Forest plots

| Parameters | Z | p |
| --- | --- | --- |
| TBUT | 3.54 | <0.001 |
| Schimer I test | 1.41 | 0.158 |
| ocular staining score | -1.79 | 0.074 |
| rose bengal score | -2.73 | 0.006 |
| OSDI | -2.86 | 0.004 |
